# Supplementary material for: Synthetic double inversion recovery imaging in brain MRI: quantitative evaluation and feasibility of synthetic MRI and a comparison with conventional double inversion recovery and fluid-attenuated inversion recovery sequences
Source: PubMed Central journal article supplement (PMC9615305; doi:10.1186/s12880-022-00877-4), 2022-10-27
Supplement: 12880_2022_877_MOESM1_ESM.pdf [file 12880_2022_877_MOESM1_ESM.pdf]

倫理審査結果通知書

平成31年3月27日

(申請者)

放射線診断科 熊坂 百香

公立藤岡総合病院  
病院長 石崎政利

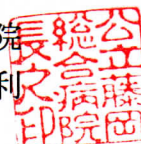

2019年2月21日付で申請のあった事項について、次のとおり決定したので通知します。

|                |                                                        |
|----------------|--------------------------------------------------------|
| 1 医療・医学研究等申請項名 | MRI MAGiC アプリケーションの日常臨床での使用と MaGiC を用いた WAIR 画像の作成について |
| 2 審議決定事項       | 承認                                                     |
